# Supplementary material for: Fast and mild palladium(ii)-catalyzed 1,4-oxidation of 1,3-dienes via activation of molecular oxygen with a designed cobalt(ii) porphyrin
Source: Royal Society of Chemistry journal article supplement (doi:10.1039/b417758d), 2005-01-01
Supplement: b417758d.pdf [file b417758d.pdf]

## Supplementary Information

### Fast and mild palladium(II)-catalyzed 1,4-oxidation of 1,3-dienes via activation of molecular oxygen with a designed cobalt(II) porphyrin

Renzo C. Verboom, Vincent F. Slagt and Jan-E. Bäckvall\*

*Department of Organic Chemistry, Arrhenius Laboratory, Stockholm University, SE-106 91  
Stockholm, Sweden.*

**Synthesis of Co(II) porphyrin 2.** Co(II) porphyrin **2** was synthesized from *L*-valinol and 5-(2-carboxyphenyl)-10,15,20-triphenyl porphyrin **4**,<sup>1</sup> as outlined in Scheme 1. For practical reasons, the corresponding 2-(10,15,20-triphenyl-porphyrin-5-yl)benzoic acid methyl ester (**3**)<sup>2</sup> was prepared by the method of Lindsey,<sup>3</sup> using a 4:3:1 mixture of pyrrole, benzaldehyde and methyl 2-formylbenzoate. 5-(2-carboxyphenyl)-10,15,20-triphenyl porphyrin (**4**) was prepared by hydrolysis of **3** using a slightly different procedure as reported previously. Treatment of **4** with thionyl chloride followed by condensation with *L*-valinol afforded amide **5**, which after insertion of cobalt gave Co(porphyrin)-amide **2** (83% from **4**).

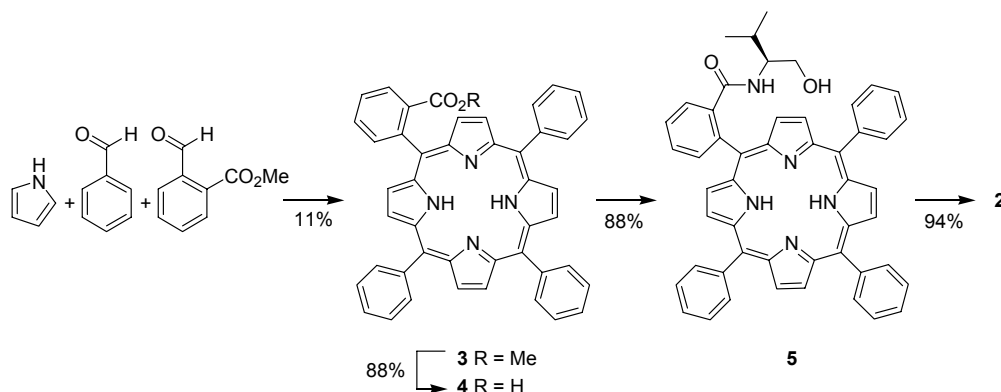

**Scheme 1** Synthesis of Co(II) porphyrin **2**.

**General.** <sup>1</sup>H (400 or 300 MHz) and <sup>13</sup>C (100 or 75 MHz) NMR spectra were recorded on a Varian Mercury spectrometer. Chemical shifts (δ) are reported in ppm, using residual solvent

<sup>1</sup> (a) Peng, X.-B.; Huang, J. W.; Li, T.; Ji, L.-N. *Inorg. Chim. Acta* **2000**, *305*, 111. (b) Peng, X.-B.; Huang, J. W.; Ji, L.-N. *Chem. J. Chin. Univ.* **1999**, *19*.

<sup>2</sup> Cho, H. S.; Jeong, D. H.; Yoon, M.-C.; Kim, Y. H.; Kim, Y.-R.; Kim, D.; Jeong, S. C.; Kim, S. K.; Aratani, N.; Shinmori, H.; Osuka, A. *J. Phys. Chem. A* **2001**, *105*, 4200.

<sup>3</sup> Lee, C. H.; Lindsey, J. S. *Tetrahedron* **1994**, *50*, 11427.

# Supplementary Material (ESI) for Chemical Communications  
# This journal is © The Royal Society of Chemistry 2005

proton resonance or tetramethylsilane as internal standard. UV-vis spectra were recorded on a Varian Cary 50 spectrometer. MALDI-TOF spectra were recorded on a Bruker Biflex III instrument. Merck silica gel 60 (240-400 mesh) was used for flash chromatography and analytical thin-layer chromatography was performed on Merck precoated silica gel 60-F<sub>254</sub> plates. Unless otherwise noted, all materials were obtained from commercial suppliers and used without further purification. Tetrahydrofuran (THF) was freshly distilled from sodium benzophenone ketyl prior to use. Dichloromethane (CH<sub>2</sub>Cl<sub>2</sub>) was distilled from calcium hydride. Solvents for extraction and chromatography (pentane and diethyl ether) were technical grade and distilled.

**5-(2-carboxyphenyl)-10,15,20-triphenyl porphyrin (4).** Methyl ester **3** (347 mg, 0.52 mmol) was dissolved in 300 mL THF, 60 mL of a 15N KOH solution was added and the mixture was refluxed overnight. The reaction mixture was cooled and the THF was evaporated *in vacuo*. 60 mL CH<sub>2</sub>Cl<sub>2</sub> was added to redissolve the porphyrin and the organic layer was washed with water (× 2), dried over Na<sub>2</sub>SO<sub>4</sub> and evaporated to dryness. Column chromatography (gradient CH<sub>2</sub>Cl<sub>2</sub> → CH<sub>2</sub>Cl<sub>2</sub>/MeOH 95:5) gave 299 mg (88%) of carboxy porphyrin **3** as a purple solid.

**2-(10,15,20-triphenyl-porphyrin-5-yl)benzoyl-L-valinol (5).** Acid **4** (299 mg, 0.46 mmol) was dissolved in 15 mL SOCl<sub>2</sub> and the solution was heated at reflux temperature for 2.5h. The solvent was evaporated *in vacuo* and coevaporated with toluene (× 3). The material was dissolved in 5 mL CH<sub>2</sub>Cl<sub>2</sub>, Et<sub>3</sub>N (127 μL, 0.91 mmol) was added and the solution was cooled to 0 °C. *L*-valinol (70.4 mg, 0.68 mmol), dissolved in 1 mL CH<sub>2</sub>Cl<sub>2</sub>, was added and the solution was stirred for 3h, during which it was allowed to reach rt. CH<sub>2</sub>Cl<sub>2</sub> was added and the organic phase was washed with water, saturated aqueous NaHCO<sub>3</sub>, and water. After drying over Na<sub>2</sub>SO<sub>4</sub>, the solvent was evaporated *in vacuo*. Column chromatography (gradient CH<sub>2</sub>Cl<sub>2</sub> → CH<sub>2</sub>Cl<sub>2</sub>/MeOH 95:5) gave 299 mg (88%) of amide **4** as a purple solid. <sup>1</sup>H NMR: δ 8.96-8.82 (m, 7H), 8.76-8.74 (d, *J* = 4.8 Hz, 1H), 8.34-8.29 (dd, *J* = 8.1, 1.5 Hz, 1H), 8.27-8.17 (m, 6H), 7.95-7.88 (dt, *J* = 7.8, 1.2 Hz, 1H), 7.84-7.72 (m, 11H), 4.92-4.87 (br d, *J* = 9.3 Hz, 1H), 2.84-2.75 (m, 1H), 1.35-1.28 (m, 2H), 0.25-0.15 (m, 1H), -0.42 (d, *J* = 6.9 Hz, 3H), -0.49 (d, *J* = 6.9 Hz, 3H), -1.70 (br s, 1H), -2.80 (s, 2H). <sup>13</sup>C NMR: δ 168.8, 142.1, 142.0, 141.9, 140.2, 139.0, 135.3, 135.0, 134.8-134.1, 129.1, 128.7, 128.0, 126.9-126.4, 121.2, 121.1, 120.9, 116.8, 61.5, 58.7, 56.3, 27.5, 18.6, 18.4, 17.5 (contains some traces of Et<sub>3</sub>N). UV-VIS (CH<sub>2</sub>Cl<sub>2</sub>): λ = 419, 515, 551, 591, 657 nm. MALDI-TOF MS: Calc. for C<sub>50</sub>H<sub>41</sub>N<sub>5</sub>O<sub>2</sub>: 743.3259; Found 743.4592 [M]<sup>+</sup>.

**2-(10,15,20-triphenyl-cobalt(II)porphyrin-5-yl)benzoyl-L-valinol (Co(II) porphyrin 2).**

A solution of  $\text{Co}(\text{OAc})_2 \cdot 4\text{H}_2\text{O}$  (264 mg, 1.06 mmol), dissolved in 12.5 mL MeOH, was added to a solution of amide **5** (263 mg, 0.35 mmol) in 50 mL  $\text{CH}_2\text{Cl}_2$ , and the reaction was heated at reflux temperature for 4h. After cooling to rt, the solution was washed with water ( $\times 4$ ), dried ( $\text{Na}_2\text{SO}_4$ ) and the solvent was evaporated. 267 mg (94%) of **2** was obtained as a purple-red solid. UV-VIS ( $\text{CH}_2\text{Cl}_2$ ):  $\lambda = 412, 530$  nm. MALDI-TOF MS: Calc. for  $\text{C}_{50}\text{H}_{39}\text{N}_5\text{O}_2\text{Co}$ : 800.2436; Found 800.3088  $[\text{M}]^+$ .

**General procedure for the aerobic 1,4-oxidation of 1,3-dienes.** 1,3-Cyclohexadiene (95  $\mu\text{L}$ , 1.0 mmol) was added to a solution of  $\text{Pd}(\text{OAc})_2$  (5.61 mg, 0.025 mmol) and Co(II) porphyrin **2** (22 mg, 0.0275 mmol) in 2 mL HOAc. The reaction was stirred under an oxygen atmosphere at room temperature for 16 h. The solution was diluted with saturated aqueous NaCl (5 mL) and extracted with pentane/ $\text{Et}_2\text{O}$  1:1 ( $3 \times 15$  mL). The combined organic phases were washed with ice-cold 1M NaOH ( $3 \times 10$  mL) and the combined aqueous phases were back-extracted with pentane/ $\text{Et}_2\text{O}$  1:1 ( $3 \times 10$  mL). The combined organic phases were washed with saturated aqueous NaCl ( $2 \times 5$  mL), dried ( $\text{MgSO}_4$ ) and evaporated.

**Table 1.** Aerobic 1,4-oxidation of 1,3-cyclohexadiene: variation of solvents<sup>a</sup>

| entry           | ligand   | oxidant      | solvent                                        | yield (%) <sup>b</sup> | trans/cis <sup>c</sup> |
|-----------------|----------|--------------|------------------------------------------------|------------------------|------------------------|
| 1               | <b>2</b> | $\text{O}_2$ | $\text{CH}_2\text{Cl}_2 / \text{AcOH} = (5/1)$ | 32                     | 83:17                  |
| 2               | <b>2</b> | $\text{O}_2$ | Acetone / AcOH = (5/1)                         | 17                     | 76:24                  |
| 3               | <b>2</b> | $\text{O}_2$ | $\text{CH}_3\text{CN} / \text{AcOH} = (5/1)$   | 18                     | 18:82                  |
| 4               | <b>2</b> | $\text{O}_2$ | $\text{DMSO} / \text{AcOH} = (5/1)$            | 19                     | 2:98                   |
| 5               | <b>2</b> | $\text{O}_2$ | $\text{DMF} / \text{AcOH} = (5/1)$             | 21                     | 68:32                  |
| 6               | <b>2</b> | $\text{O}_2$ | $\text{THF} / \text{AcOH} = (5/1)$             | 21                     | 81:19                  |
| 7               | <b>2</b> | $\text{O}_2$ | $\text{EtOAc} / \text{AcOH} = (5/1)$           | 26                     | 81:19                  |
| 8               | <b>2</b> | $\text{O}_2$ | AcOH                                           | 44                     | 47:53                  |
| 9 <sup>d</sup>  | <b>2</b> | $\text{O}_2$ | AcOH                                           | 19                     | 22:78                  |
| 10 <sup>e</sup> | -        | $\text{O}_2$ | $\text{DMSO} / \text{AcOH} = (1/1)$            | 20                     | 5:95                   |

<sup>a</sup> Reactions were performed on a 0.5 mmol scale. Reaction conditions: the diene was added to a solution of  $\text{Pd}(\text{OAc})_2$  (2.5 mol%), **2** (2.75 mol%) and LiOAc (30 mol%) in 1 mL solvent. The reaction was stirred at rt under an oxygen atmosphere for 16 h. <sup>b</sup> Isolated yields of 1,4-diacetoxy-2-cyclohexene. <sup>c</sup> Determined by  $^1\text{H}$  NMR. <sup>d</sup> With 10 mol% LiCl. <sup>e</sup> Performed on a 1.0 mmol scale. Reaction conditions: the diene was added to a solution of  $\text{Pd}(\text{OAc})_2$  (2.5 mol%) and LiOAc (30 mol%) in 2 mL solvent. The reaction was stirred at rt under an oxygen atmosphere for 16 h.

**UV-vis spectroscopy titration experiments.** In a typical experiment the UV-vis cuvette was filled with 2.5 ml of  $1.0 \times 10^{-6}$  M Co(II) porphyrin **2** in acetic acid. In addition, a  $2.5 \times 10^{-3}$  M lithium acetate and a  $1.0 \times 10^{-6}$  M Co(II) porphyrin **2** solution in acetic acid was added stepwise. Measurements were performed at room temperature under air. In the UV-vis spectrum the typical decrease of the Q-bands of the porphyrin at 530 nm was followed (figure 1). We have analyzed the titration curves with a fitting program developed by Hunter.<sup>4</sup>

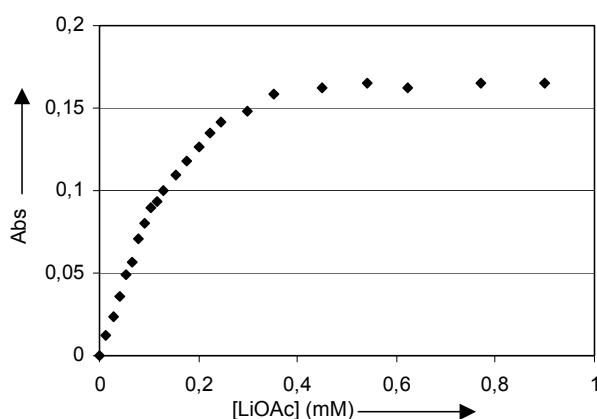

**Figure 1.** Plot of absorption at 530nm (Abs) versus the concentration of LiOAc (mM) taken from the spectroscopy titration experiments in acetic acid,  $K_1 = 2.2 \times 10^3 \text{ M}^{-1}$  and  $K_2 = 1.0 \times 10^4 \text{ M}^{-1}$ .

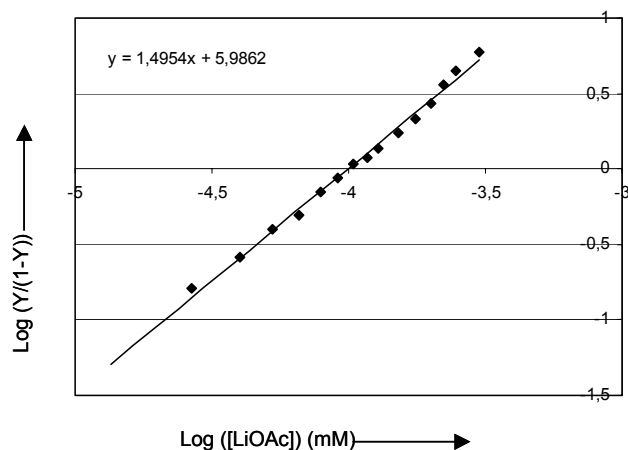

**Figure 2.** Hill-plot of absorption at 530nm taken from the spectroscopy titration experiments in acetic acid (Y = Fractional saturation, Hill coefficient ( $n_h$ ) = 1.5).

<sup>4</sup> Bisson, A. P.; Hunter, C. A.; Carlos, J.; Young, K. *Chem. Eur. J.* **1998**, *4*, 845.
